# Supplementary material
Source: publisher figshare collection journal article supplement (https://geolsoc.figshare.com/articles/dataset/_/3453866)

# Supplementary Data 4 - Concordia plots for LA-ICP-MS samples

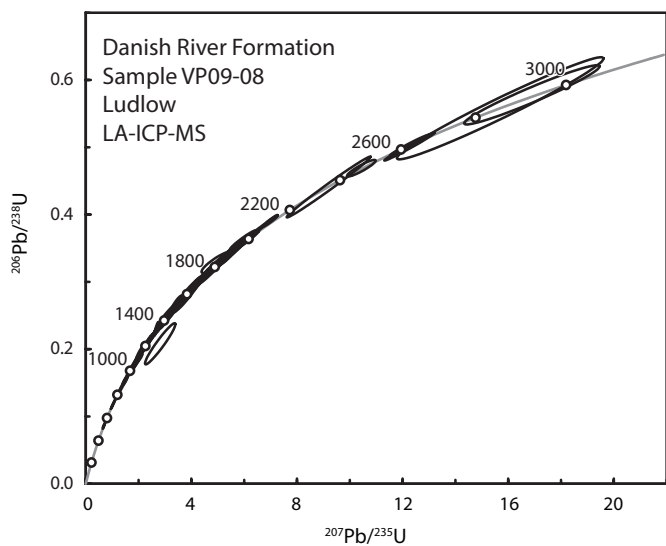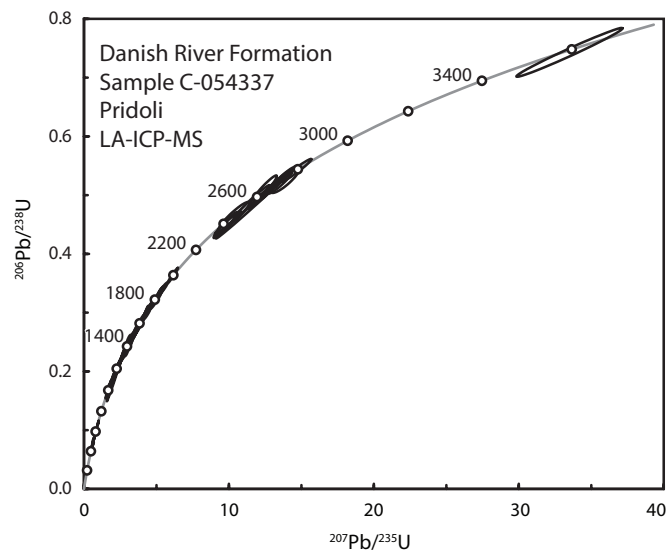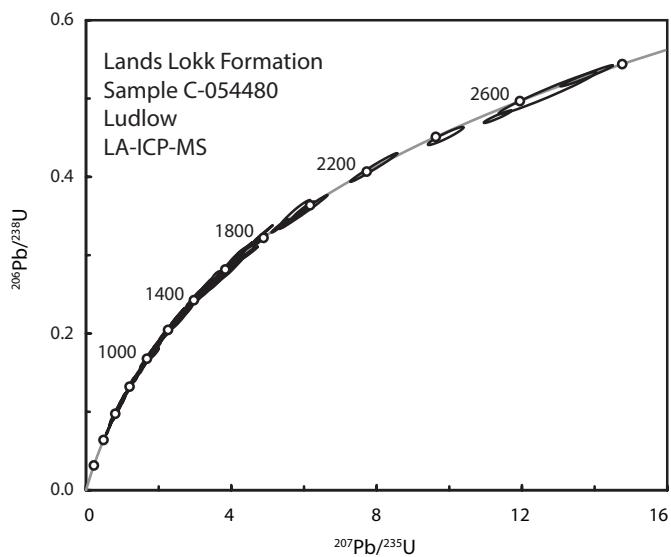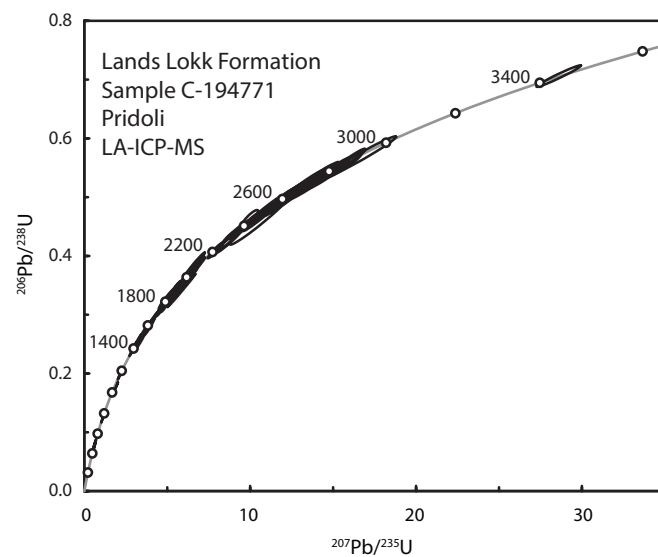

Supplement: Supplementary file 1 [file 1]

### Supplementary Data 3 - Concordia plots for SIMS samples

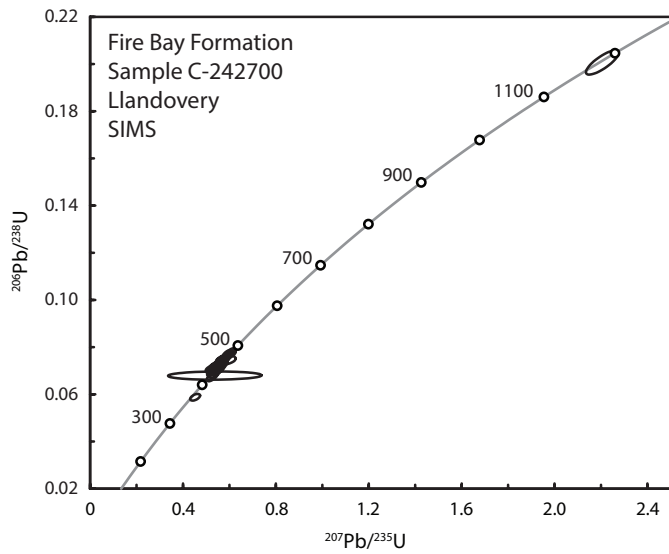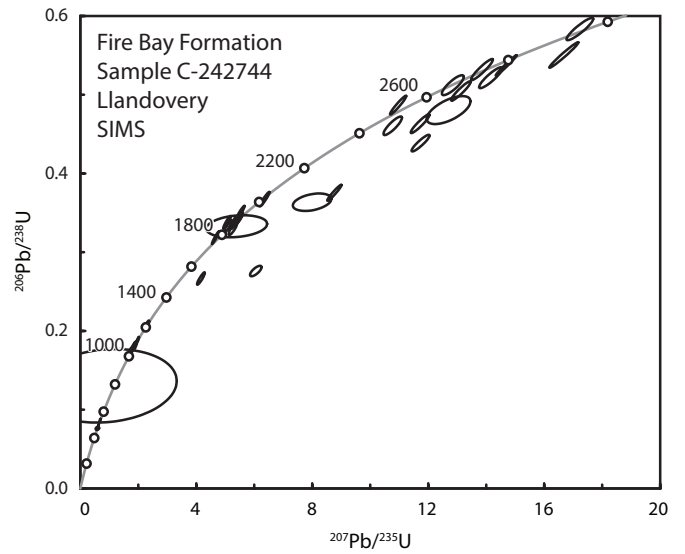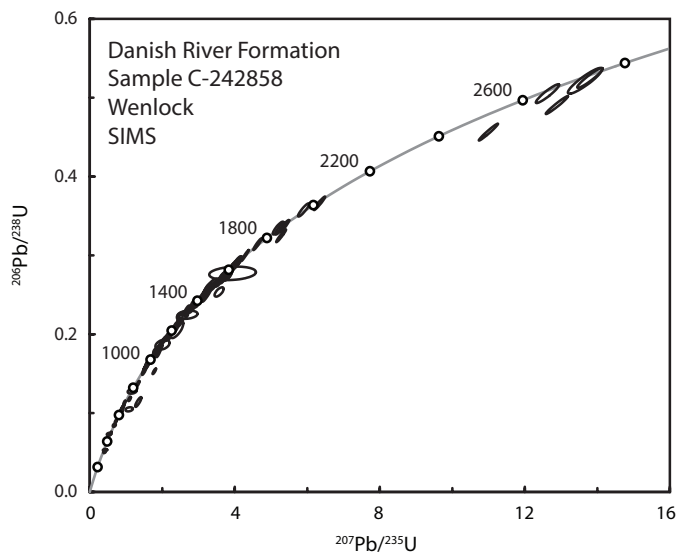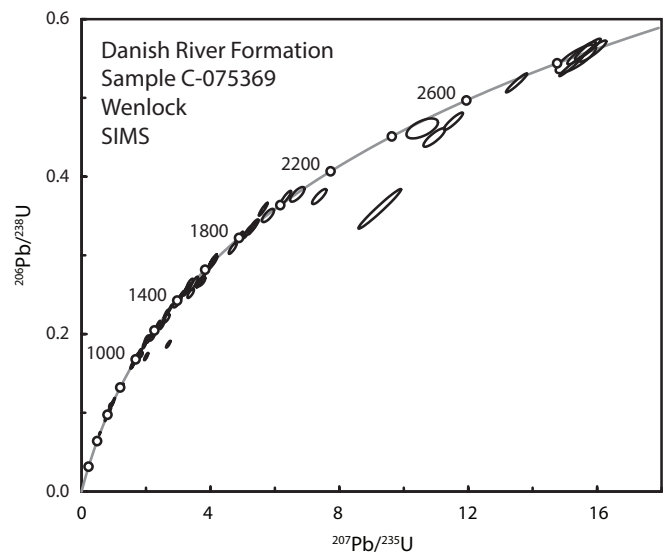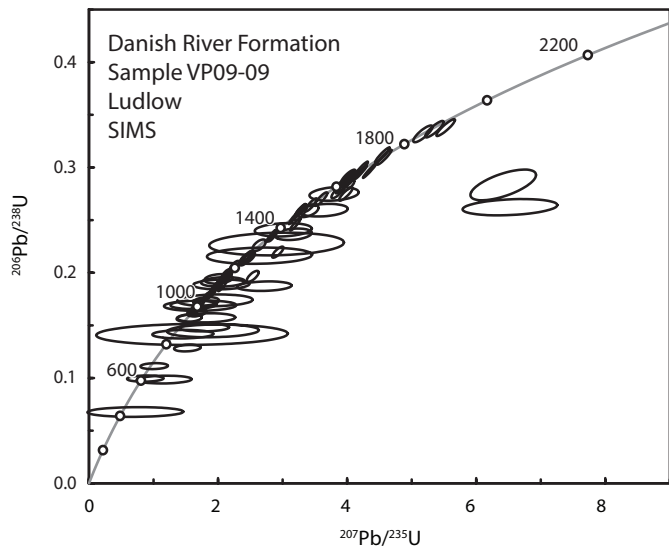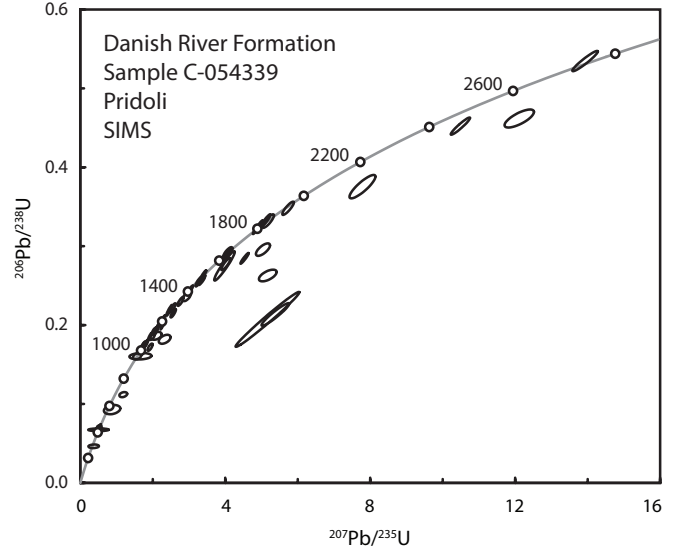

Supplement: Supplementary file 2 [file 1]
